# Supplementary material for: The Baby Friendly Hospital Initiative and Ten Steps to Successful Breastfeeding programs: Applying the Non-adoption, Abandonment, Spread, Scale up, Sustainability (NASSS) health technology adoption framework to analyze challenges to hospital implementation in Australia and Indonesia
Source: Research Square preprint supplement (doi:10.21203/rs.3.rs-5745188/v1), 2025-06-27
Supplement: Supplementary file 1 [file 87246e884243cddc2e0aceff.docx]

Additional file 1

**The adapted version of NASSS questionnaire for policy evaluation**

| **Domain/Question** | **Simple** | **Complicated** | **Complex** |
| --- | --- | --- | --- |
| **Domain 1: The Condition or illness** | | | |
| 1A. What is the nature of the condition or illness? | Well-characterized, well-understood, predictable | Not fully characterized, understood or predictable | Poorly characterized, poorly understood, unpredictable, or high risk |
| *1A. What is the nature of the condition that the policy aims to address?* | *same as above* | *same as above* | *same as above* |
| 1B. What are the relevant sociocultural factors and comorbidities? | Unlikely to affect care significantly | Must be factored into care plan and service model | Pose significant challenges to care planning and service provision |
| *1B. What are the relevant sociocultural factors and comorbidities that are likely to affect the condition?* | *same as above* | *same as above* | *same as above* |
| **Domain 2: The technology** | | | |
| 2A. What are the key features of the technology? | Off-the-shelf or already installed, freestanding, dependable | Not yet developed or fully interoperable, not 100% dependable | Requires close embedding in complex technical systems, significant dependability issues |
| *2A. What are the features of the policy?* | *Can be implemented freely in any health settings, independent of other stakeholders.* | *Dependent to other stakeholders across health system, or need a little modification and/or adaptation to implement* | *Significantly dependent to other stakeholders across health system and difficult to implement without modification and/or adaptation* |
| 2B. What kind of knowledge does the technology bring into play? | Directly and transparently measures [changes in] the condition | Partially and indirectly measures [changes in] the condition | Link between data generated and [changes in] the condition is currently unpredictable or contested |
| *2B. What kind of benefit (new knowledge, attitude, skill or behaviour) does the policy bring?* | *The benefits are direct and short-term for all stakeholders.* | *The benefits are mixed short, middle and long-term for some stakeholder, or unknown benefits to the individual hospital.* | *The benefits are all long-term for some stakeholders and unknown direct benefits for the hospital.* |
| 2C. What knowledge and/or support is required to use the technology? | None or a simple set of instructions | Detailed instruction and training needed, perhaps with ongoing helpdesk support | Effective use of technology requires advanced training and/or support to adjust to new identity or organizational role |
| *2C. What knowledge and/or support is required to implement or practice the policy?* | *Does not need knowledge and/or support to implement the policy.* | *Needs knowledge and/or support to implement the policy, but training is budgeted and provided regularly.* | *Needs advanced knowledge and/or support to implement the policy and regular training to increase the knowledge.* |
| 2D. What is the technology supply model? | Generic, “plug and play”, or COTS (Customized, Off-the Shelf) solutions requiring minimal customization; easily substitutable if supplier withdraws | COTS solutions requiring significant customization or bespoke solutions; substitution difficult if supplier withdraws | Solutions requiring significant organizational reconfiguration or medium-to large scale-bespoke solution; highly vulnerable to supplier withdrawal. |
| *2D. What is the supplier/investor model?* | *The BFHI accreditation is integrated into national program, the government encourages and hospital does not require incentive to achieve and maintain it.* | *The BFHI accreditation is not integrated into national program, and hospital might require incentive to achieve and maintain it but the government encourages.* | *The BFHI accreditation is not integrated into national program. Hospital needs incentive to achieve and maintain it. The government supports but lack of priority.* |
| **Domain 3: The value proposition** | | | |
| 3A. What is the developer’s business case for the technology (supply-side value)? | Clear business case with strong chance of return on investment | Business case underdeveloped; potential risk to investors | Business case implausible; significant risk to investors |
| *3A. What is the developer’s business case for the policy (supply-side value)?* | *Same as above* | *Same as above* | *Same as above* |
| 3B. What is the desirability, efficacy, safety, and cost-effectiveness (demand-side value)? | Technology is desirable for patients, effective, safe and cost effective | Technology’s desirability, efficacy, safety, or cost effectiveness is unknown or contested | Significant possibility that technology is undesirable, unsafe, ineffective, or unaffordable |
| *3B. What is the desirability, efficacy, safety and effectiveness of this policy (demand side)?* | *The policy is desirable for patients, effective, safe and cost effective* | *The policy’s desirability, efficacy, safety, or cost effectiveness is unknown or contested* | *Significant possibility that the policy is undesirable, unsafe, ineffective, or unaffordable* |
| **Domain 4: The adopter system** | | | |
| 4A. What changes in staff roles, practices and identities are implied? | None | Existing staff must learn new skills and/or new staff be appointed | Threat to professional identity, values, or scope or practice; risk of job loss |
| *4A. What changes in staff roles, practices and identities are implied?* | *None* | *same as above* | *same as above* |
| 4B. What is expected of the patient (and/or immediate caregiver)-and is this achievable by, and acceptable to, them? | Nothing | Routine task, e.g. Log on, enter data, converse | Complex tasks, e.g. initiate changes in therapy, make judgements, organize |
| *4B. What is expected from the mothers and families, and is this achievable by, and acceptable to, them?* | *Nothing* | *Some commitment, knowledge and support, or misalignment of some cultural belief with the policy.* | *Significant commitment, knowledge and support, and misalignment of some cultural belief with the policy.* |
| 4C. What is assumed about the extended network of lay caregivers? | None | Assumes a caregiver will be available when needed | Assumes a network of caregivers with ability to coordinate their input |
| *4C. What is assumed about the extended network of support groups and lay caregivers?* | *There are support groups freely available in the community that enable continuity of care and with direct referral from the maternity care or first care provider.* | *There are support groups in the community that enable continuity of care, but with an additional fee, no direct referral* | *No network of support groups in the community; or there are support groups in the community requiring additional fees, but no direct referral, and do not provide continuity of care.* |
| **Domain 5: The organization** | | | |
| 5A. What is the organization’s capacity to innovate? | Well-led organization with slack resources and good managerial relations; risk taking encouraged | Limited slack resources; suboptimal leadership and managerial relations; risk taking not encouraged | Severe resource pressures (e.g. frozen posts); weak leadership and managerial relations; risk taking may be punished |
| *5A. What is the organization’s capacity to innovate?* | *Same as above* | *Same as above* | *Same as above* |
| 5B. How ready is the organization for this technology-supported change? | High tension for change, good innovation-system fit, widespread support | Little tension for change; moderate innovation-system fit; some powerful opponents | No tension for change; poor innovation-system fit; many opponents, some with wrecking power |
| *5B. How ready is the organization for this policy change?* | *Same as above* | *Same as above* | *Same as above* |
| 5C. How easy will the adoption and funding decision be? | Single organization with sufficient resources; anticipated cost savings; no new infrastructure or recurrent costs required | Multiple organizations with partnership relationship; cost-benefit balance favourable or neutral; new infrastructure (e.g. staff roles, training, kit) can mostly be found from repurposing | Multiple organizations with no formal links and/or conflicting agendas; funding depends on cost savings across system; costs and benefits unclear; new infrastructure conflicts with existing; significant budget implications |
| *5C. How easy will the implementation and funding decision be?* | *No new infrastructure or recurrent costs required, and all the requirements of the implementation has already sufficed by the hospital.* | *The implementation success depends on other health entities in the community, or the funding decision depends on the perception of prioritization of the hospital manager and the government.* | *The implementation success depends on other health entities in the community, and the funding decision depends on the perception of prioritization of other healthcare managers and the government.* |
| 5D. What changes will be needed in team interactions and routines? | No new team routines or care pathways needed | New team routines or care pathways that align readily with established ones | New team routines or care pathways that conflict with established ones |
| *5D. What changes will be needed in team interactions and routines?* | *Same as above* | *Same as above* | *Same as above* |
| 5E. What work is involved in implementation and who will do it? | Established shared vision; few simple tasks, uncontested and easily monitored | Some work needed to build shared vision, engage staff, enact new practices, and monitor impact | Significant work needed to build shared vision, engage staff, enact new practices and monitor impact |
| *5E. What work is involved in implementation and who will do it?* | *Same as above* | *Same as above* | *Same as above* |
| **Domain 6: The wider context** | | | |
| 6A. What is the political, economic, regulatory, professional (e.g. medico legal), and sociocultural context for program rollout? | Financial and regulatory requirements already in place nationally; professional bodies and civil society supportive | Financial and regulatory requirements being negotiated nationally; professional and lay stakeholders not yet committed | Financial and regulatory requirements raise tricky legal or other challenges; professional bodies and lay stakeholders unsupportive or opposed |
| *6A. What is the political, economic, regulatory, professional (e.g. medico legal), and sociocultural context for program rollout?* | *Same as above* | *Same as above* | *Same as above* |
| **Domain 7: Embedding and adaptation over time** | | | |
| 7A. How much scope is there for adapting and coevolving the technology and the service over time? | Strong scope for adapting and embedding the technology as local need or context changes | Potential for adapting and coevolving the technology and service is limited or uncertain | Significant barriers to further adaptation and/or coevolution of the technology or service |
| *7A. How much scope is there for adapting and coevolving the policy and the service over time?* | *Strong scope for adapting and embedding the policy as local need or context changes* | *Potential for adapting and coevolving the policy and service is limited or uncertain* | *Significant barriers to further adaptation and/or coevolution of the policy or service* |
| 7B. How resilient is the organization to handling critical events and adapting to unforeseen eventualities? | Sense making, collective reflection, and adaptive action are ongoing and encouraged | Sense making, collective reflection, and adaptive action are difficult and viewed as low priority | Sense making, collective reflection, and adaptive action are discouraged in a rigid, inflexible implementation model |
| *7B. How resilient is the organization to handling critical events (complicated births, how mothers can maintain breastfeeding after discharge from hospital) and adapting to unforeseen eventualities (social norms that hamper breastfeeding)?* | *Same as above* | *Same as above* | *Same as above* |

* The italicized version is the adapted version to examine BFHI and Ten Steps.
